# Supplementary material for: Donor–acceptor conjugated polymers based on cyclic imide substituted quinoxaline or dibenzo[a,c]phenazine for polymer solar cells
Source: Royal Society of Chemistry journal article supplement (doi:10.1039/c5py01235j), 2015-01-01
Supplement: c5py01235j1.pdf [file c5py01235j1.pdf]

**Supporting Information**

**Donor-acceptor conjugated polymers based on cyclic imide substituted quinoxaline or dibenzo[*a,c*]phenazine for polymer solar cells**

Liuyuan Lan, Zhiming Chen, Yunchuan Li, Lei Ying\*, Fei Huang\* and Yong Cao

State Key Laboratory of Luminescent Materials and Devices, and Institute of Polymer Optoelectronic Materials and Devices, South China University of Technology, Guangzhou 510640, China

Corresponding author.

Tel: +86 20 87114346

Fax: +86 20 87110606

*E-mail*: msfhuang@scut.edu.cn (F. Huang); msleiyang@scut.edu.cn (L. Ying)

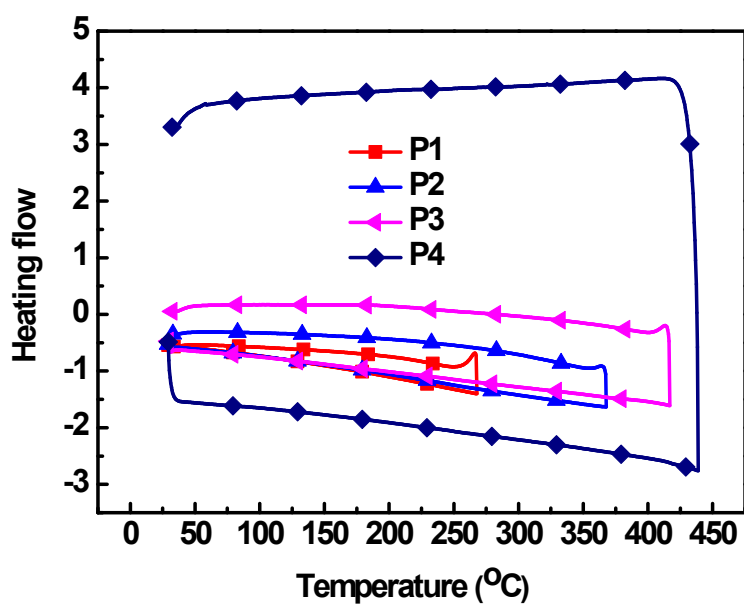

**Figure S1.** Second heating and cooling DSC traces of polymers with a heating rate of  $10\text{ }^{\circ}\text{C min}^{-1}$  and a cooling rate  $20\text{ }^{\circ}\text{C min}^{-1}$  under nitrogen.

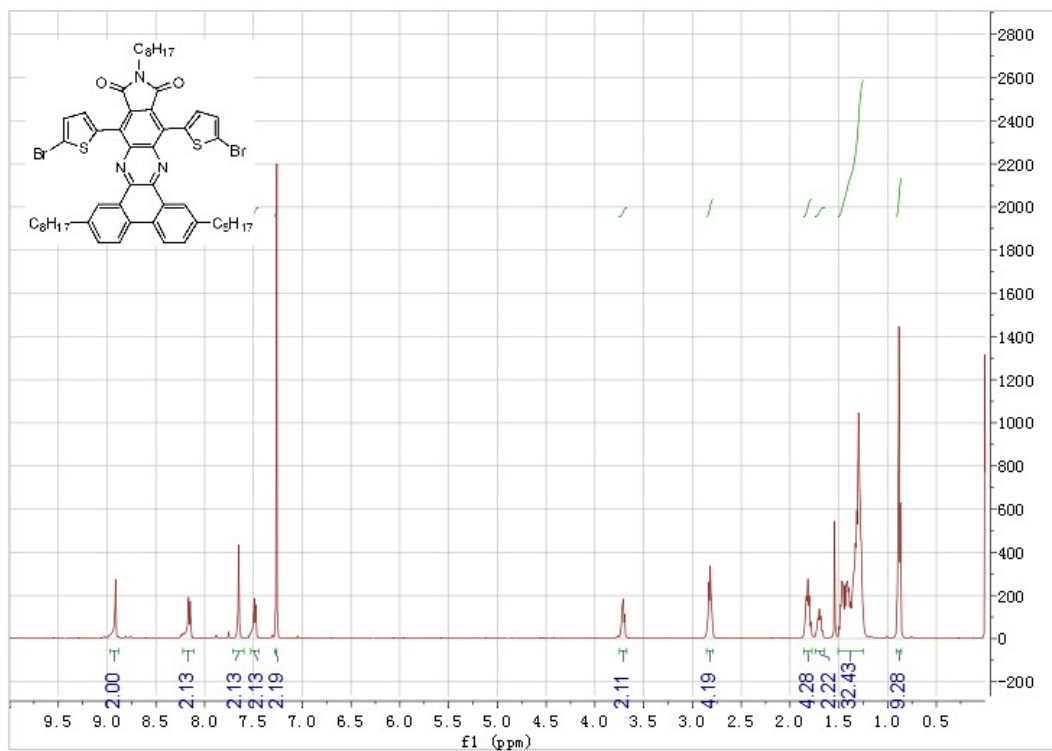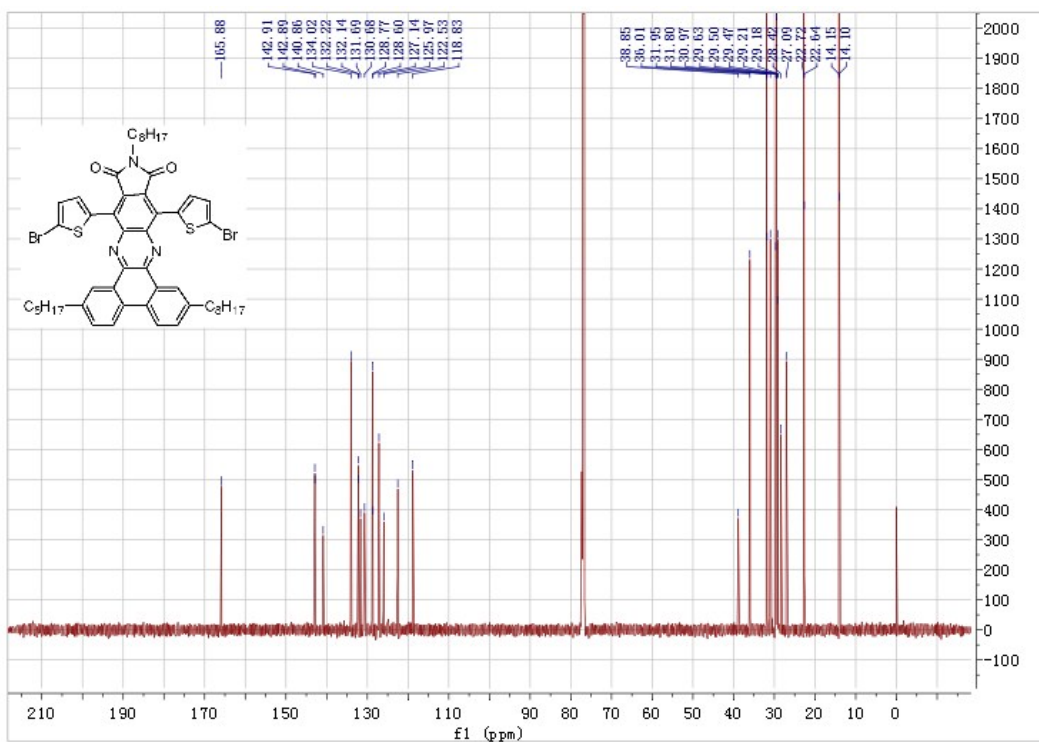

**Figure S2.** <sup>1</sup>H and <sup>13</sup>C NMR spectra of Br<sub>2</sub>-TBPDI.

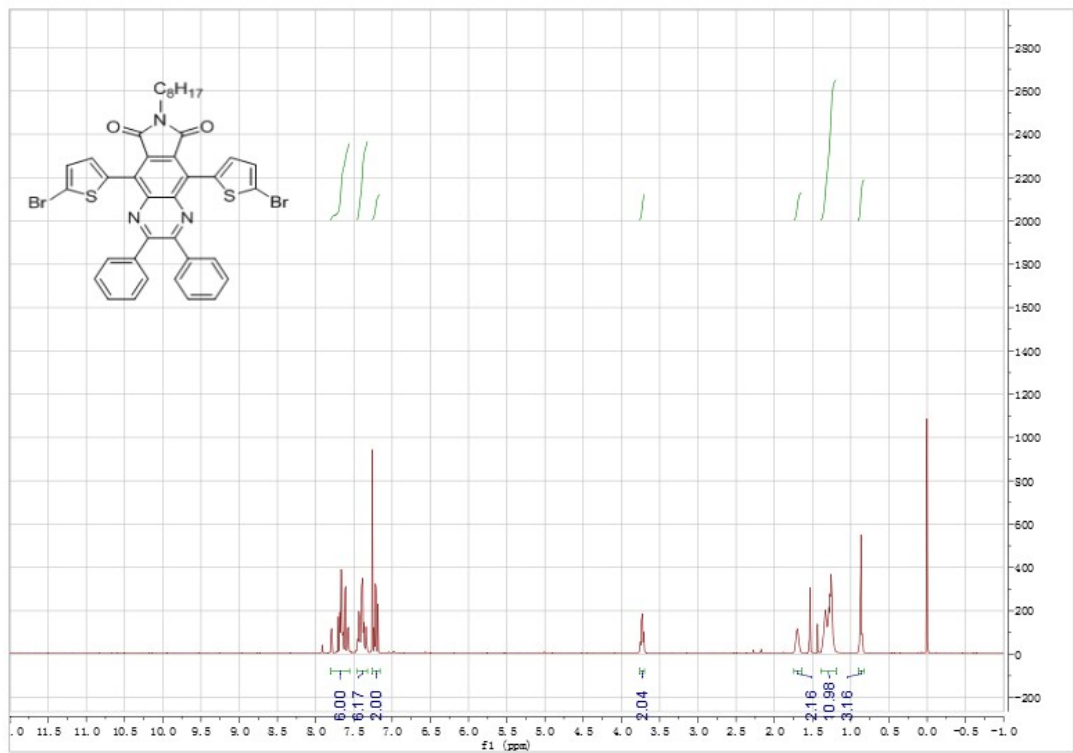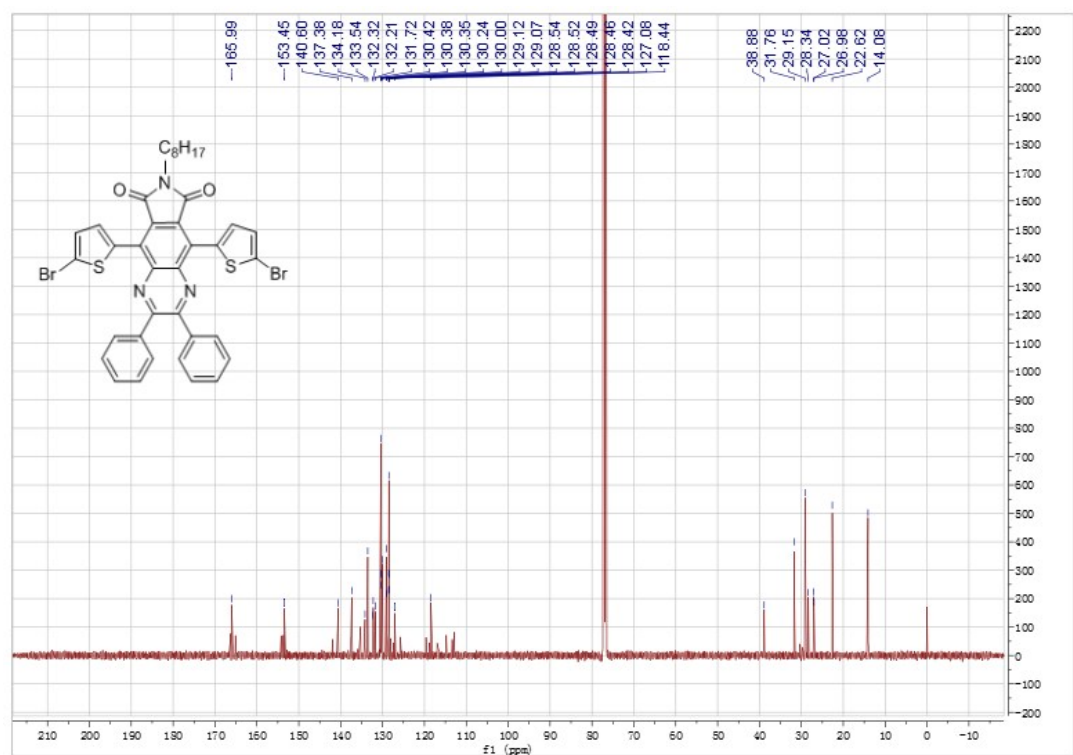

**Figure S3.** <sup>1</sup>H and <sup>13</sup>C NMR spectra of Br<sub>2</sub>-TPQD.

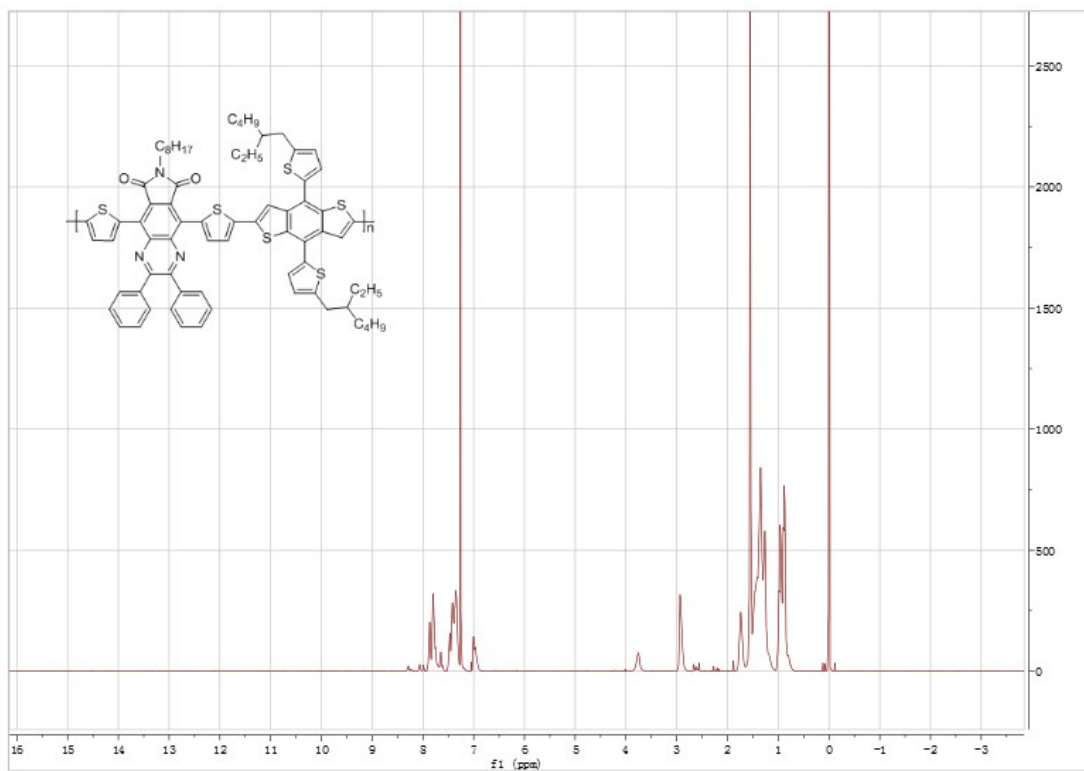

**Figure S4.** <sup>1</sup>H NMR spectrum of **P1**.

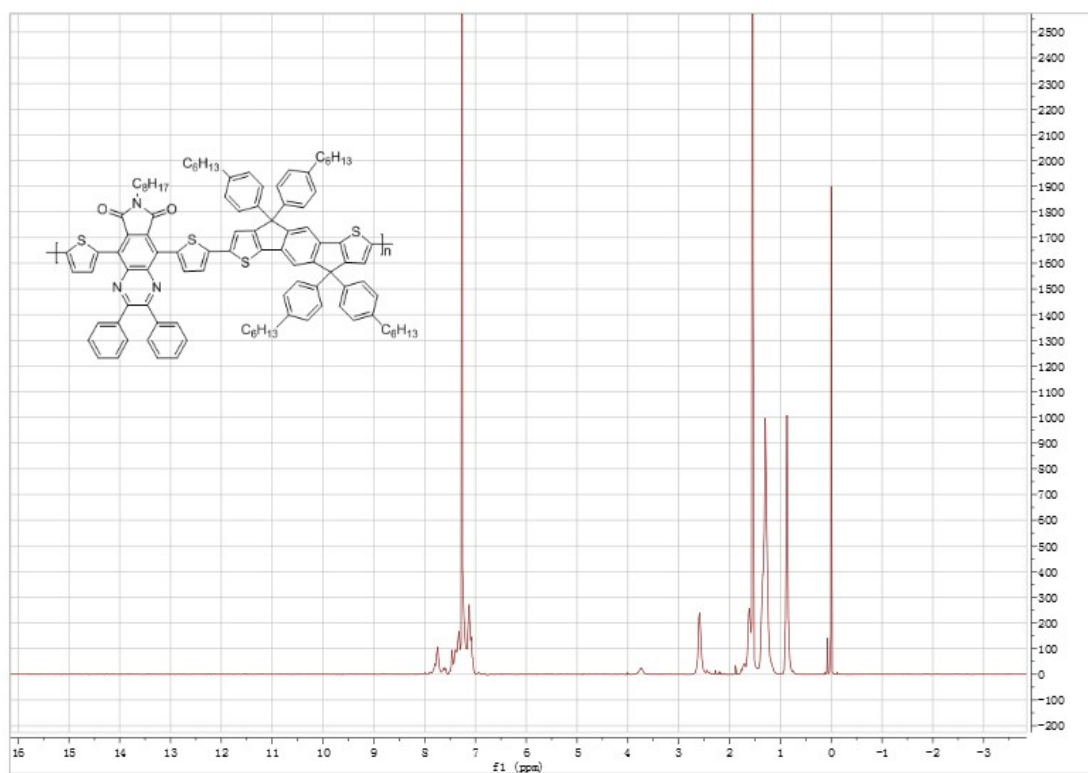

**Figure S5.** <sup>1</sup>H NMR spectrum of **P2**.

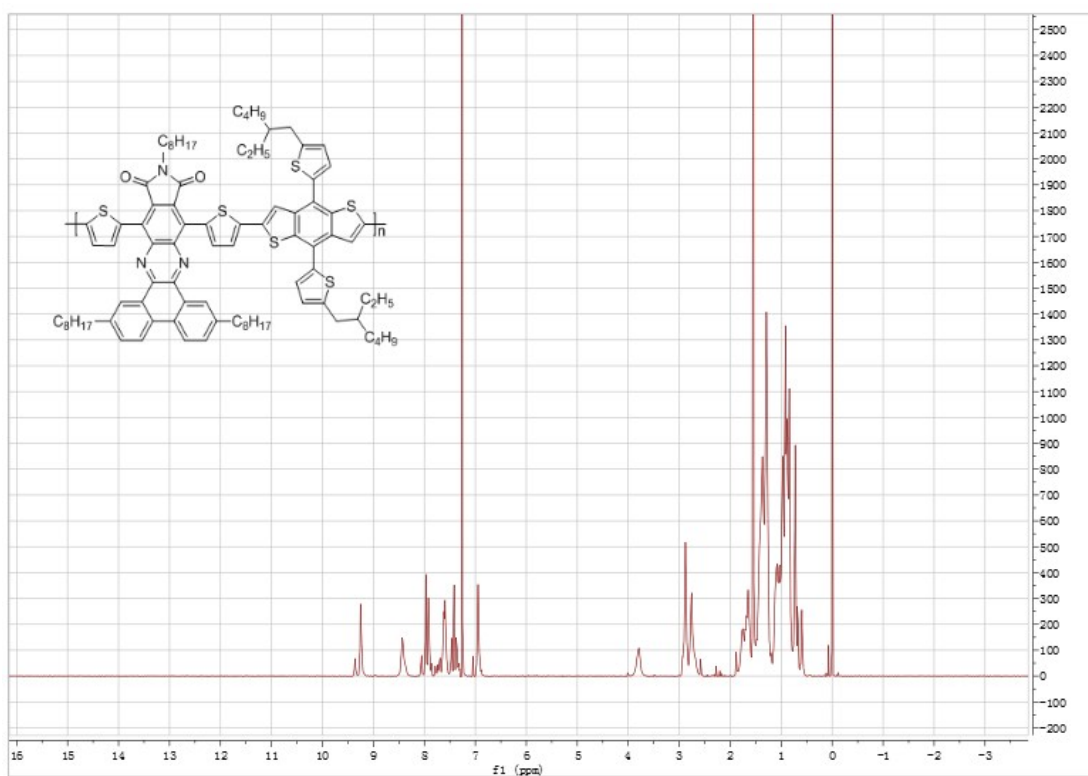

**Figure S6.** <sup>1</sup>H NMR spectrum of P3.

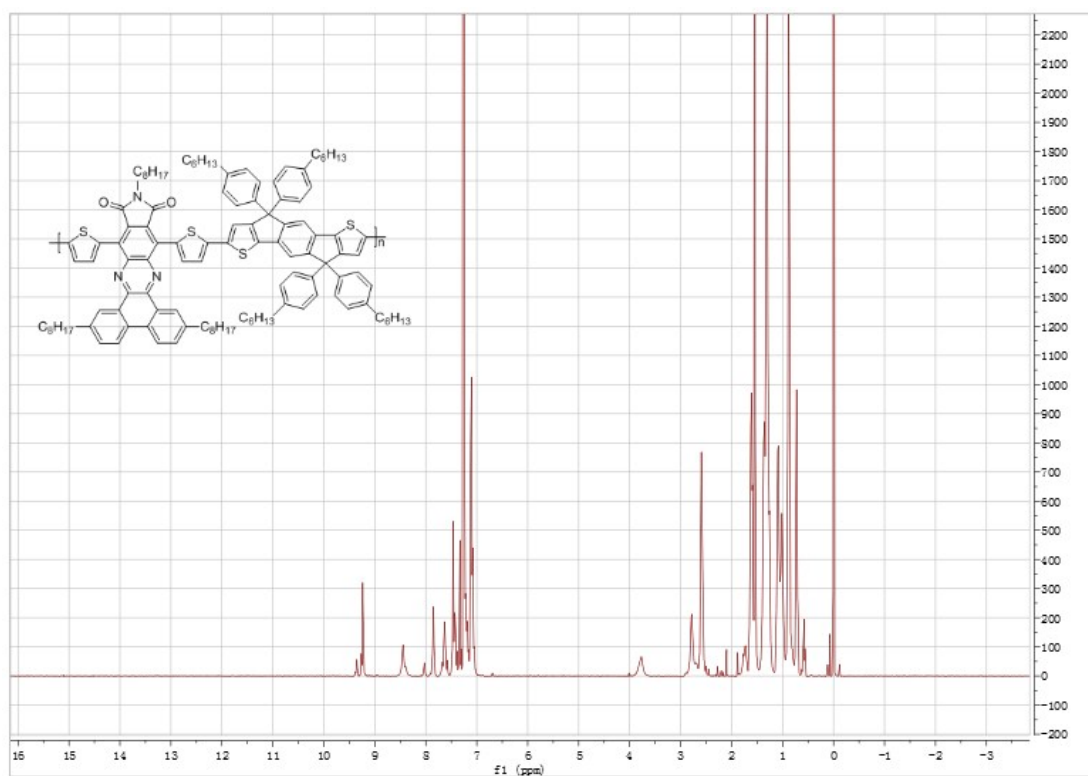

**Figure S7.** <sup>1</sup>H NMR spectrum of P4.
